# Supplementary material for: Prolyl oligopeptidase inhibition reduces alpha‐synuclein aggregation in a cellular model of multiple system atrophy
Source: PubMed Central journal article supplement (PMC8505845; doi:10.1111/jcmm.16910), 2021-09-05
Supplement: JCMM-25-9634-s001.pdf [file JCMM-25-9634-s001.pdf]

## **Prolyl oligopeptidase inhibition reduces alpha-synuclein aggregation in a cellular model of multiple system atrophy**

Cui H<sup>1</sup>, Kilpeläinen T<sup>1</sup>, Zouzoula L<sup>1</sup>, Auno S<sup>1</sup>, Trontti K<sup>2,3,4</sup>, Kurvonen S<sup>1</sup>, Norrbacka S<sup>1</sup>, Hovatta I<sup>2,3,4</sup>, Jensen PH<sup>5</sup>, Myöhänen TT<sup>1,6,7#</sup>

<sup>1</sup> Division of Pharmacology and Pharmacotherapy/Drug Research Program, University of Helsinki, Finland

<sup>2</sup> SleepWell Research Program, Faculty of Medicine, University of Helsinki, Finland.

<sup>3</sup> Department of Psychology and Logopedics, University of Helsinki, Finland.

<sup>4</sup> Neuroscience Center, University of Helsinki, Finland.

<sup>5</sup> Department of Biomedicine & DANDRITE, Aarhus University, Denmark

<sup>6</sup> Integrative Physiology and Pharmacology Unit, Institute of Biomedicine, University of Turku, Finland

<sup>7</sup> School of Pharmacy, University of Eastern Finland, Finland

# corresponding author:

Dr. Timo T. Myöhänen

Division of Pharmacology and Pharmacotherapy / Drug Research Programme

Faculty of Pharmacy

Viikinkaari 5E (PO Box 56)

00014 University of Helsinki

FINLAND

email: [timo.myohanen@helsinki.fi](mailto:timo.myohanen@helsinki.fi)

tel. +358-50-5641426

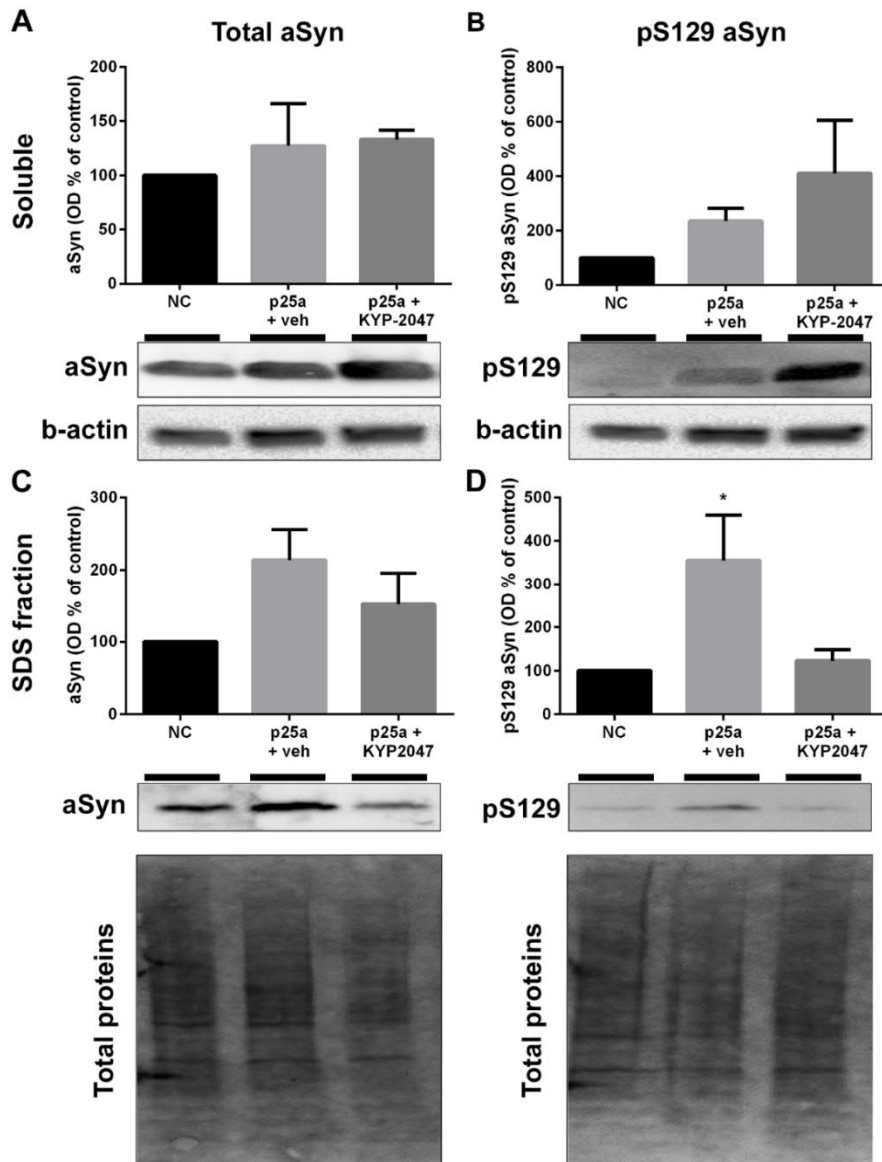

**Figure S1. Effect of PREP inhibition on aSyn and pS129 aSyn aggregation after 24 h incubation.** OLN-AS7 cells transfected with p25 $\alpha$  showed elevated soluble total and serine 129 phosphorylated aSyn (pS129 aSyn) but this was not significant (A-B). In the SDS-fraction, aSyn and pS129 aSyn were elevated but only the phosphorylated form was significantly increased from control (C-D). 24 h incubation with 10  $\mu$ M KYP-2047 reduced the levels of pS129 aSyn close to control levels (NC, negative control). Data is presented as mean  $\pm$  SEM. \*,  $p < 0.05$ , 1-way ANOVA with Tukey's post test (D). See supplementary figure S8 for uncut blots.

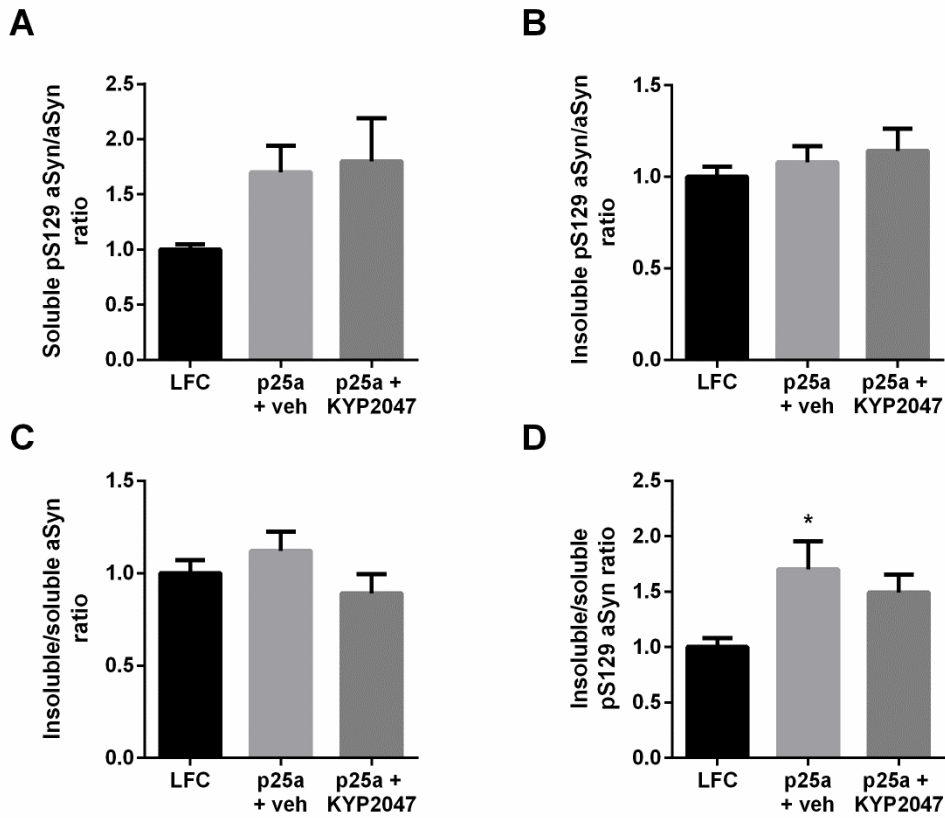

**Figure S2. The effect of p25a transfection on aSyn ratios in OLN-AS7 cells.** p25a did not alter the ratios between aSyn and pS129 aSyn (A-C) but significantly elevated the ratio between soluble and insoluble pS129 aSyn (D;  $F_{2,17} = 6.784$ ,  $p < 0.05$  LFC vs. p25a+vehicle; 1-way ANOVA with Tukey's post-test).

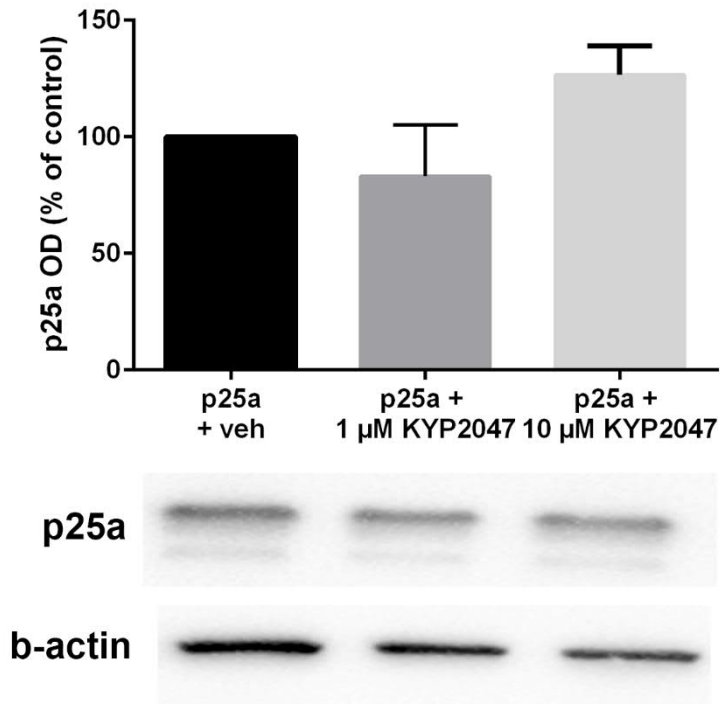

**Figure S3.** PREP inhibition has no effect on p25a levels after 48 h incubation. See Supplementary Fig. S9 for uncut blots.

Figure 3A / aSyn

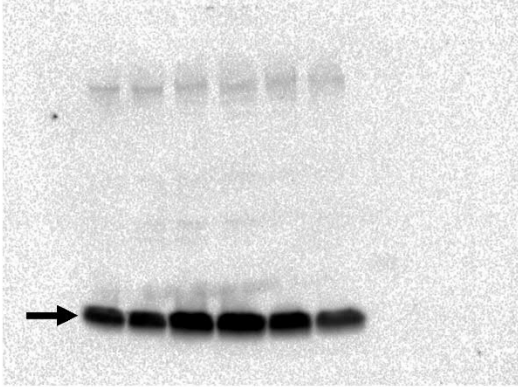

Figure 3B / pS129

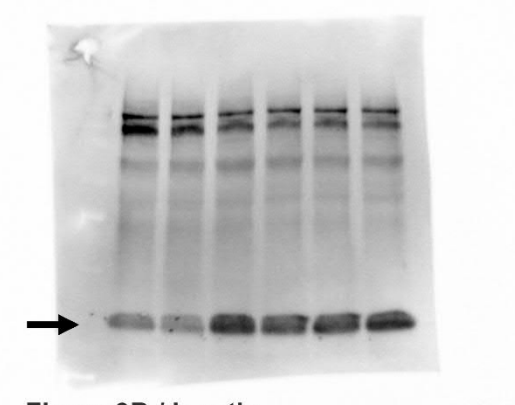

Figure 3A / b-actin

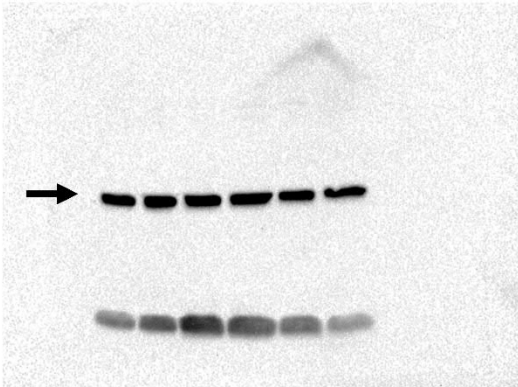

Figure 3B / b-actin

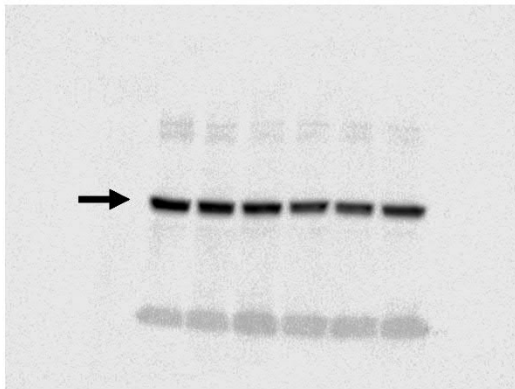

Figure 3C / aSyn

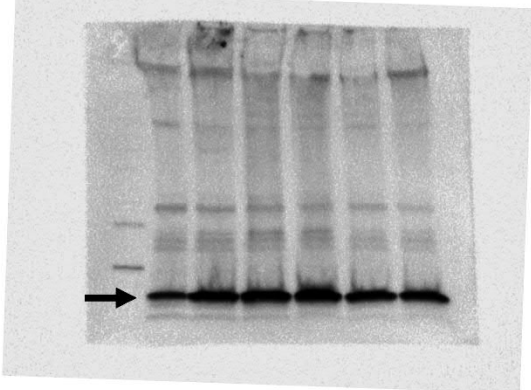

Figure 3D / pS129

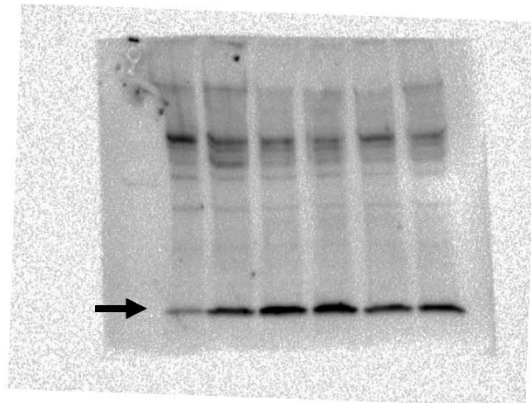

Total protein

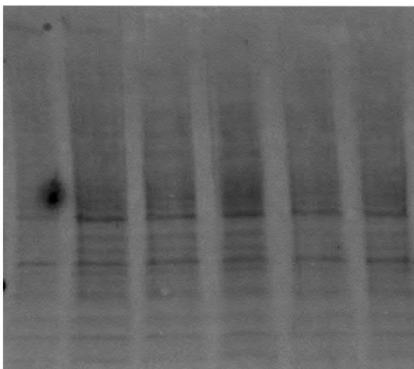

Total protein

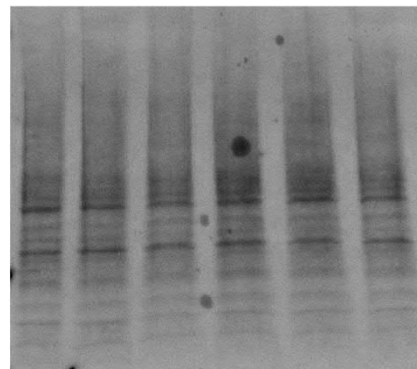

Figure S4. Uncut blots for Figure 3. Arrowhead marks the presented and analyzed band.

Figure 4A / PP2Ac

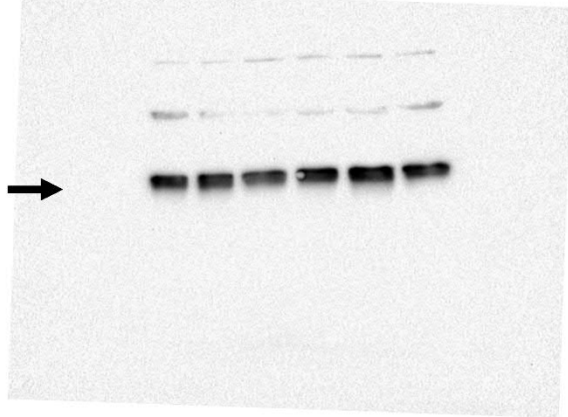

Figure 4B / pPP2Ac

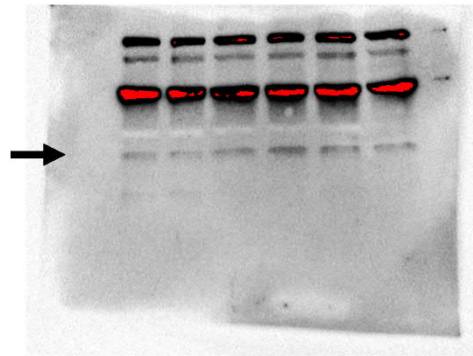

Figure 4A / b-actin

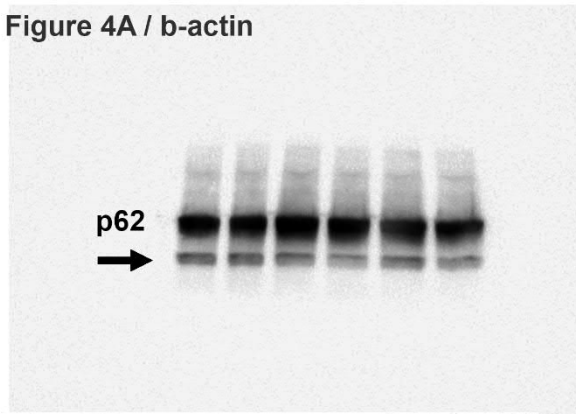

Figure 4B / b-actin

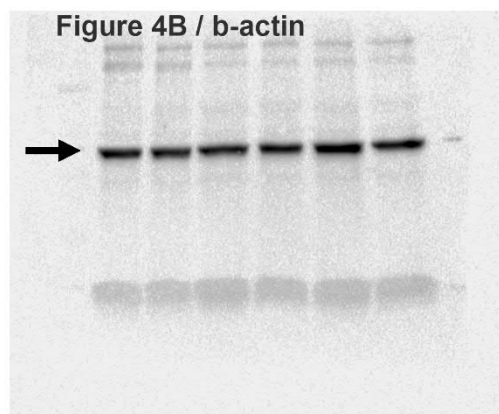

Figure 4C / p62

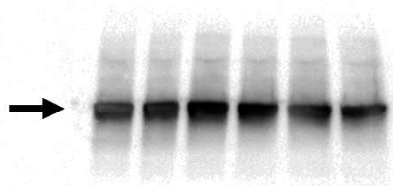

Figure 4D / LC3B

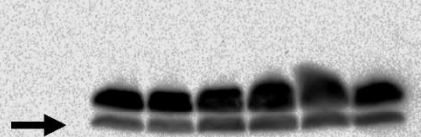

Figure 4C / b-actin

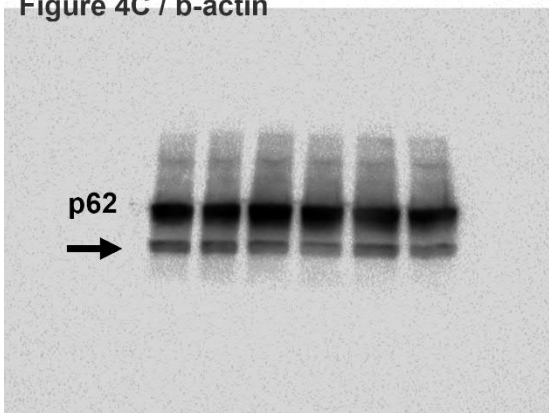

Figure 4D / b-actin

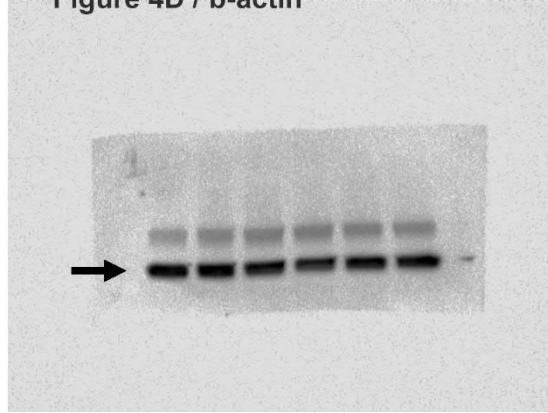

Figure S5. Uncut blots for Figure 4. Arrowhead marks the presented and analyzed band.

5A / aSyn

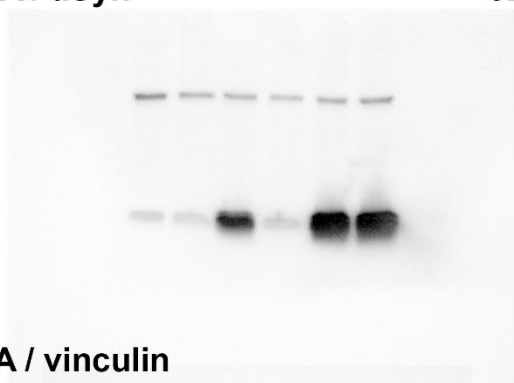

5B / pS129 aSyn

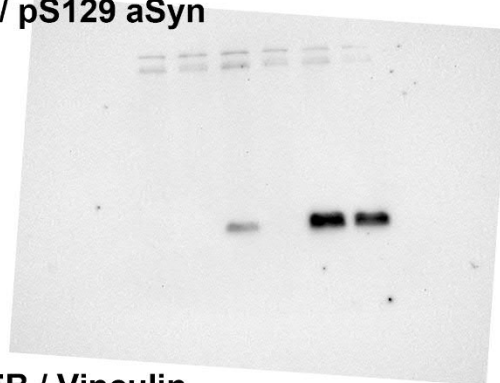

5A / vinculin

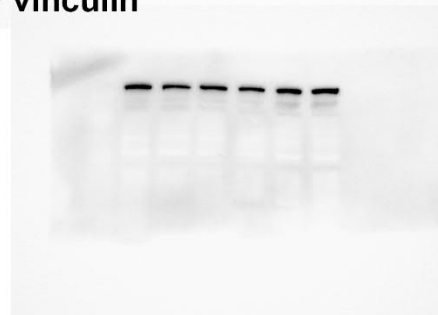

5B / Vinculin

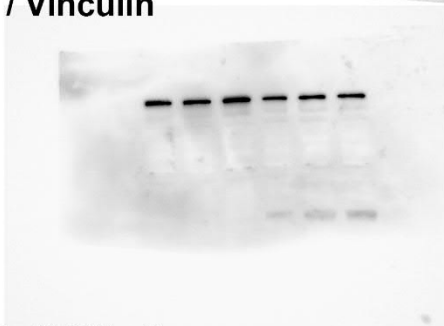

5C / aSyn

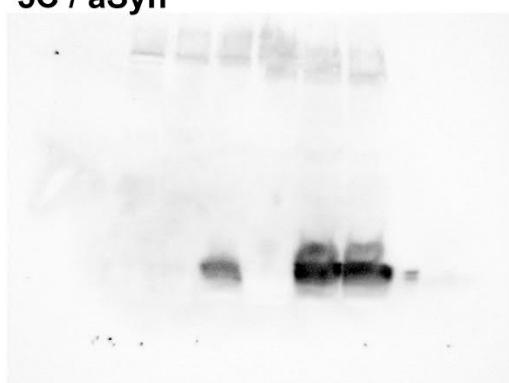

5D / pS129 aSyn

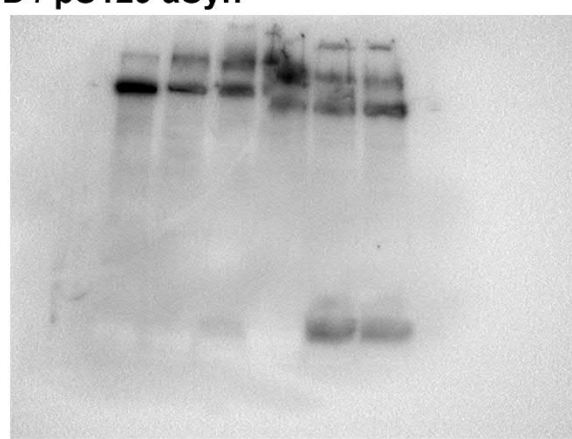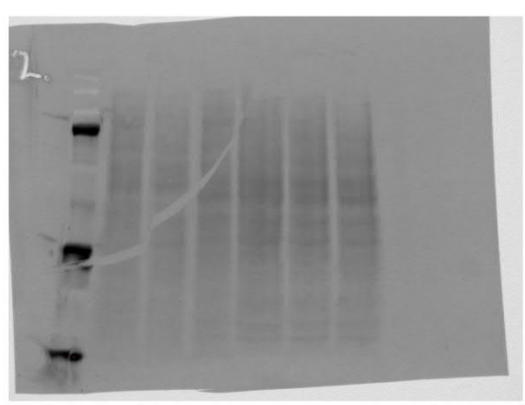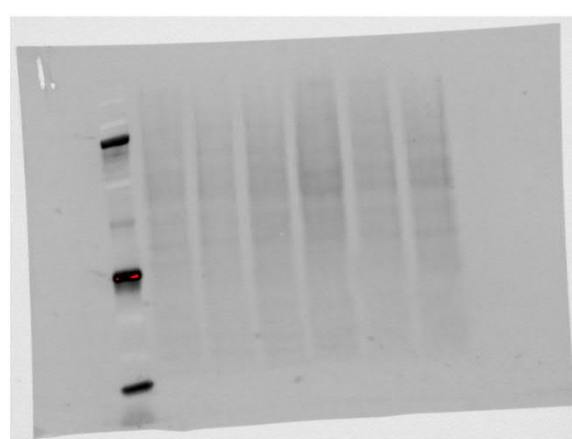

Figure S6. Uncut blots for Figure 5.

**Fig 6A / PP2Ac**

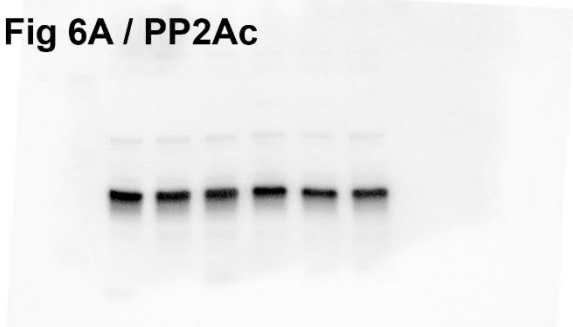

**Fig 6B / pPP2Ac**

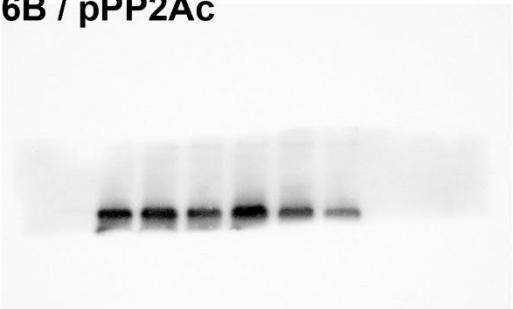

**Fig 6A / vinculin**

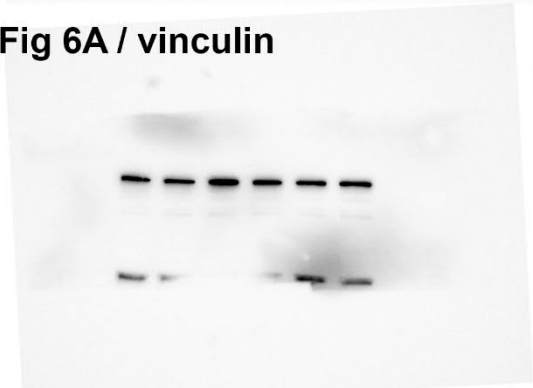

**Fig 6B / vinculin**

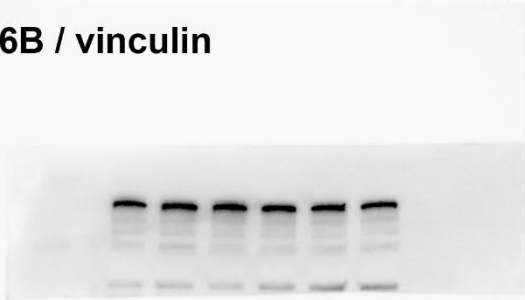

**Fig 6C / p62**

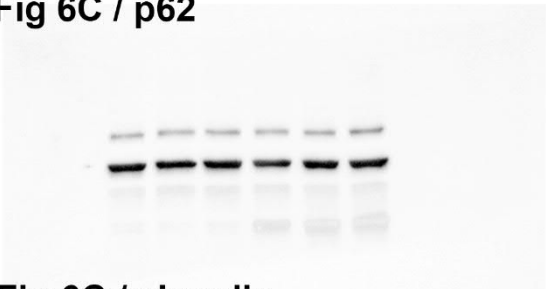

**Fig 6D / LC3B**

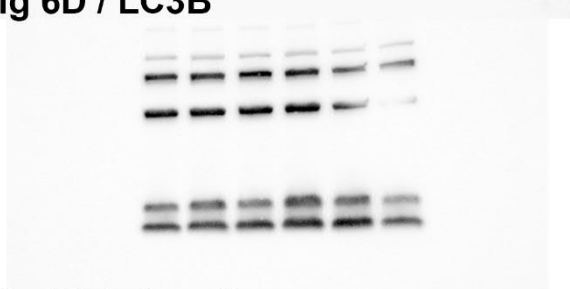

**Fig 6C / vinculin**

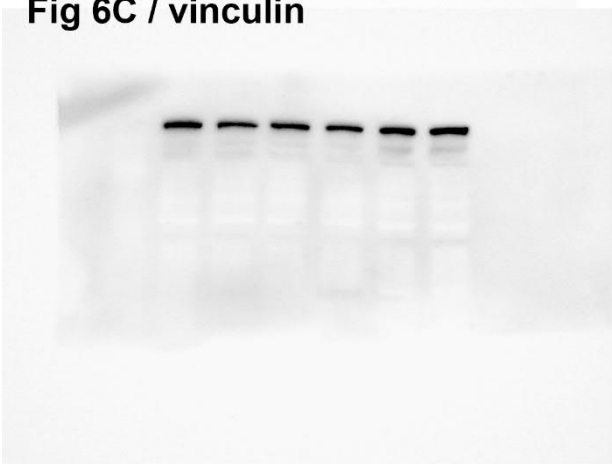

**Fig 6D / vinculin**

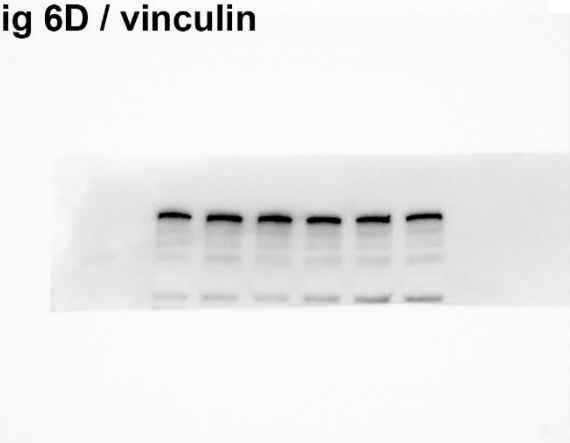

**Figure S7. Uncut blots for Figure 6.**



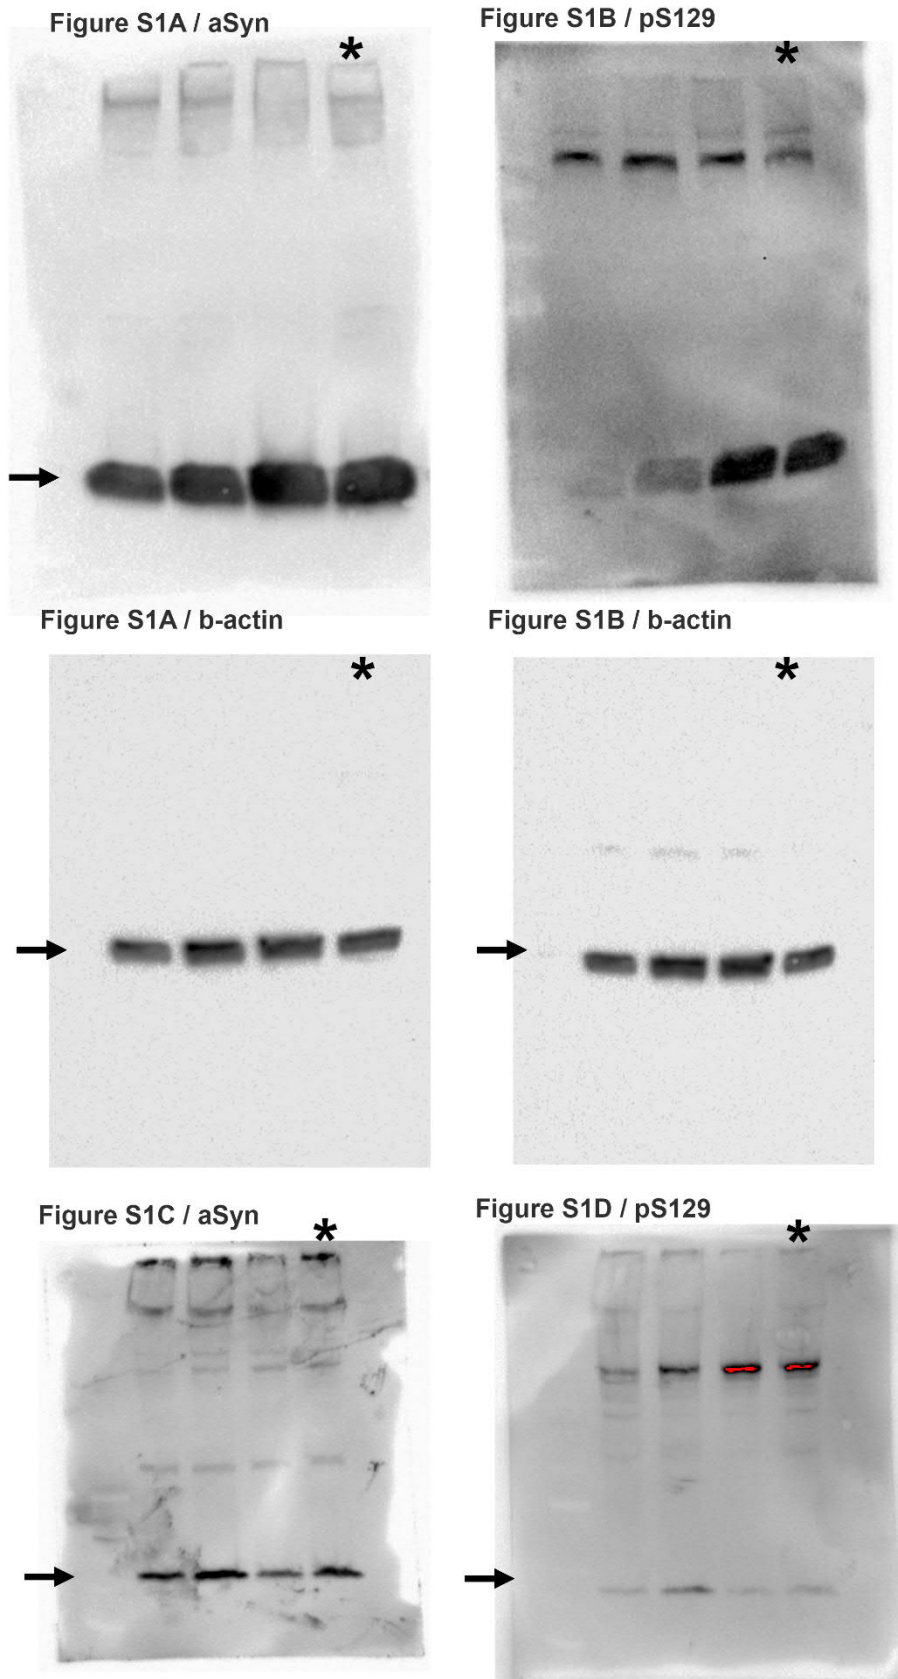

**Figure S8. Uncut blots for Figure S1.** Arrowhead marks the presented and analyzed band. \* marks for experimental PREP inhibitor not published in this article (4<sup>th</sup> lane).

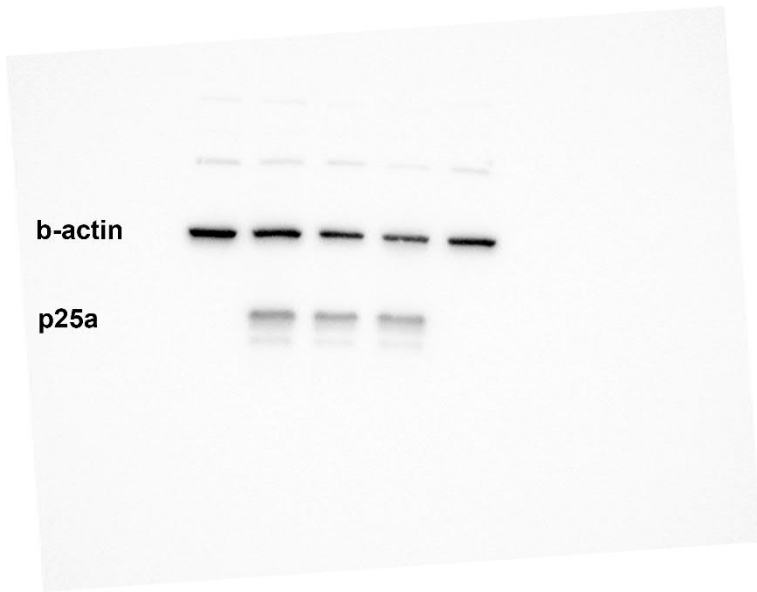

**Figure S9. Uncut blots for Figure S3.**
